# Supplementary material
Source: PubMed Central journal article supplement (PMC4563783)
Supplement: cdd201517x2.pdf [file cdd201517x2.pdf]

**Table S1. Commercial antibodies used for WB and IF**

| <b>Antibody</b>             | <b>Host Species</b> | <b>Clone</b>      | <b>Source</b>                | <b>Dilution WB</b> | <b>Dilution IF</b> |
|-----------------------------|---------------------|-------------------|------------------------------|--------------------|--------------------|
| Anti-Rab4                   | rabbit              | -                 | StessMarq                    | -                  | 1:1000             |
| Anti-Rab5                   | mouse               | 1/Rab5            | BD Biosciences               | 1:500              | -                  |
| Anti-Rab7                   | mouse               | D-4               | Santa Cruz                   | 1:250              | -                  |
| Anti-Rab8                   | mouse<br>rabbit     | 63-BJ<br>-        | Santa Cruz<br>Cell Signaling | 1:250<br>1:1000    | -<br>1:400         |
| Anti-Rab11                  | mouse<br>rabbit     | A-6<br>-          | Santa Cruz<br>Cell Signaling | 1:250<br>1:1000    | -<br>1:50          |
| Anti-Rab29                  | mouse<br>rabbit     | -<br>-            | AbCam                        | 1:1000<br>1:500    | -<br>-             |
| Anti-dynein                 | mouse<br>rabbit     | 74.1<br>-         | Millipore<br>AbCam           | 1:500<br>1:1000    | -<br>-             |
| Anti-Kif3A                  | rabbit              | -                 | Sigma                        | 1:500              | -                  |
| Anti-CD19 FITC              | mouse               | 4G7               | BioLegend                    | -                  | -                  |
| Anti-CD3 $\epsilon$         | goat                | -                 | Santa Cruz                   | 1:500              | -                  |
| Anti-CD3 $\zeta$            | mouse               | 6B10.2            | Santa Cruz                   | 1:50               | 1:15               |
| Anti-Erk2                   | rabbit              | -                 | Santa Cruz                   | 1:500              | -                  |
| Anti-P-p44/42 MAPK (Erk1/2) | rabbit              |                   | Cell Signaling               | 1:500              | -                  |
| Anti-pTyr                   | mouse               | 4G10 <sup>®</sup> | Millipore                    | 1:500              | 1:100              |
| Anti-actin                  | mouse               | C4                | Millipore                    | 1:2000             | -                  |
| Anti-GFP                    | mouse<br>rabbit     | 3E6<br>-          | Life Technologies            | 1:1000<br>1:1000   | -<br>1:400         |
| Anti-Integrin $\beta$ 1     | mouse               | 47BR              | Santa Cruz                   | -                  | 1:100              |
| Anti-GM130                  | mouse               | 35/GM130          | BD Biosciences               | -                  | 1:100              |
| Anti-TGN46                  | sheep               |                   | AbD Serotec                  | -                  | 1:1000             |
| Anti- $\gamma$ -tubulin     | mouse<br>rabbit     | GTU-88<br>-       | Sigma                        | -<br>-             | 1:200<br>1:200     |
| Anti-tubulin acetylated     | mouse               | 6-11B-1           | Sigma                        | -                  | 1:100              |

**Table S2. esiRNAs used for Rab29KD**

| <b>Gene Symbol</b> | <b>esiRNA sequence</b>                                          |
|--------------------|-----------------------------------------------------------------|
|                    |                                                                 |
| hRAB29             | AGAACGGTTTCACAGGTTGGACAGAAACATCAGTCAAGGAGAAC<br>AAAAATATTAATGA  |
| mRAB29             | GCGTTTCACATCCATGACACGACTCTACTATAGAGATGCTTCTGC<br>CTGTGTTATTATGT |
| RLUC               | GATAACTGGTCCGCAGTGGTGGGCCAGATGTAAACAAATGAATG<br>TTCTTGATTCATTTA |

RAB: Ras-related protein; RLUC: Renilla Luciferase; h: human; m: mouse.

**Table S3. Primers used for qRT-PCR**

| Gene Symbol  | Forward primer 5'-3'        | Reverse primer 5'-3'        |
|--------------|-----------------------------|-----------------------------|
| hRAB29       | CGTCTAGGGAATCGAGGTGC        | CAGCTCCTTACACCACTGGG        |
| hRAB32       | TCCAAATGGCAGCCCTATCC        | CATCCGGCAAAGCCATGTTC        |
| hRAB38       | TGGGATATCGCAGGTCAAGAAA      | ACCGGTTTGCCATTAGGGAG        |
| <b>hRAB5</b> | <b>ACCATTGGGGCTGCTTTTCT</b> | <b>GCTGCTTGTGCTCCTCTGTA</b> |
| hHPRT1       | AGATGGTCAAGGTCGCAAG         | GTATTCATTATAGTCAAGG         |
| mRab29       | GCAAGCTCACACTACCCAGT        | AACGAGGACTCTCATGGCCT        |
| mRab32       | CCATGGCTTCACTGGATGGT        | GGCACAGAGACACATCAGCA        |
| mRab38       | CACATTTGAAGCCGTGGCAA        | GCACATCCTTCCCTTGGTCA        |
| <b>mRab5</b> | <b>CCAACGGGCCAAATACTGGA</b> | <b>ACAAGCGAAGAACCAGGCT</b>  |
| mGapdh       | AACGACCCCTTCATTGAC          | TCCACGACATACTCAGCAC         |

RAB: Ras-related protein; HPRT1: hypoxanthine phosphoribosyltransferase 1; GAPDH: glyceraldehyde-3-phosphate dehydrogenase; h: human; m: mouse.
